# Supplementary material for: Understanding the self-ordering of amino acids into supramolecular architectures: co-assembly-based modulation of phenylalanine nanofibrils
Source: Royal Society of Chemistry journal article supplement (doi:10.1039/d0qm00784f), 2020-12-22
Supplement: d0qm00784f1.pdf [file d0qm00784f1.pdf]

**Understanding the self-ordering of amino acids into supramolecular architects: Co-assembly based modulation of phenylalanine nanofibrils**

Prabhjot Singh<sup>a</sup>, Satish K. Pandey<sup>b</sup>, Aarzo Grover<sup>†,c</sup>, Rohit K. Sharma<sup>c</sup> and Nishima Wangoo<sup>d,\*</sup>

<sup>a</sup>*Centre for Nanoscience and Nanotechnology, Panjab University, Sector 25, Chandigarh-160014, India.*

<sup>b</sup>*Central Scientific Instruments Organization, Sector-30C, Chandigarh-160030, India.*

<sup>c</sup>*Department of Chemistry & Centre for Advanced Studies in Chemistry, Panjab University, Sector 14, Chandigarh-160014, India.*

<sup>d</sup>*Department of Applied Sciences, University Institute of Engineering and Technology (U.I.E.T.), Panjab University, Chandigarh-160014, India.*

\*E-mail: - nishima@pu.ac.in

**Present Address**

<sup>†</sup>Department of Chemistry, University of Vermont, Burlington, Vermont-05405, USA.

**Table S1. Amino potential value, hydrophobicity index (kyte doolitte and GES), and solubility profile in water for amino acids divided into separate categories**

| Amino Acid                                                                 |               | Hydration potential value | Hydrophobicity Index (Kyte Doolittle) | Hydrophobicity Index (GES) | Solubility in water (mg/mL) |
|----------------------------------------------------------------------------|---------------|---------------------------|---------------------------------------|----------------------------|-----------------------------|
| <b>Category I</b>                                                          |               |                           |                                       |                            |                             |
| Amino acids with neutral aliphatic side chain (except glycine and proline) | Glycine       | 2.39                      | -0.4                                  | 1.0                        | 250                         |
|                                                                            | leucine       | 2.28                      | 3.8                                   | 2.8                        | 24                          |
|                                                                            | Isoleucine    | 2.15                      | 4.5                                   | 3.1                        | 34                          |
|                                                                            | Valine        | 1.99                      | 4.2                                   | 2.6                        | 88                          |
|                                                                            | Alanine       | 1.94                      | 1.8                                   | 1.6                        | 166                         |
|                                                                            | Cysteine      | -1.24                     | 2.5                                   | 2.0                        | 277                         |
|                                                                            | Methionine    | -1.48                     | 1.9                                   | 3.4                        | 33                          |
|                                                                            | Proline       | -                         | -1.6                                  | -0.2                       | 1620                        |
| <b>Category II</b>                                                         |               |                           |                                       |                            |                             |
| Amino acids with hydroxyl group in the side chain                          | Threonine     | -4.88                     | -0.7                                  | 1.2                        | 97                          |
|                                                                            | Serine        | -5.06                     | -0.8                                  | 0.6                        | 425                         |
| <b>Category III</b>                                                        |               |                           |                                       |                            |                             |
| Amino acids with amide group in the side chain                             | Glutamine     | -9.38                     | -3.5                                  | -4.1                       | 41.3                        |
|                                                                            | Asparagine    | -9.68                     | -3.5                                  | -4.8                       | 29.4                        |
| <b>Category IV</b>                                                         |               |                           |                                       |                            |                             |
| Amino acids with carboxylic group in the side chain                        | Glutamic acid | -10.20                    | -3.5                                  | -8.2                       | 8.5                         |
|                                                                            | Aspartic acid | -10.95                    | -3.5                                  | -9.2                       | 5.3                         |
| <b>Category V</b>                                                          |               |                           |                                       |                            |                             |
| Amino acid with cationic side chain                                        | Lysine        | -9.52                     | -3.9                                  | -8.8                       | 1000                        |
|                                                                            | Histidine     | -10.27                    | -3.2                                  | -3.0                       | 45                          |
|                                                                            | Arginine      | -19.92                    | -4.5                                  | -12.3                      | 182                         |

**Table S2: - Various set of conditions for the generation of amino acid self assembled structures**

| Category     | Amino Acid    | Water Solubility (mg/mL) | Condition (Concentration, solvent)                                         | Morphology                                   |
|--------------|---------------|--------------------------|----------------------------------------------------------------------------|----------------------------------------------|
| Category I   | Glycine       | 249.0                    | 1 mg/mL, Water and <b>water:methanol (1:1)</b>                             | Micro crystallite arranged in Fern Structure |
|              | Alanine       | 166.0                    | 1 mg/mL, Water and <b>water:methanol (1:1)</b>                             | Micro crystallite arranged in Fern Structure |
|              | Leucine       | 24.2                     | 1 mg/mL, Water and <b>water:methanol (1:1)</b>                             | Micro crystallite arranged in Fern Structure |
|              | Isoleucine    | 41.1                     | 1 mg/mL, Water and <b>water:methanol (1:1)</b>                             | Micro crystallite arranged in Fern Structure |
|              | Valine        | 58.5                     | 1 mg/mL, <b>Water</b> and water:methanol (1:1)                             | Micro crystallite deposits                   |
|              | Proline       | 1623.0                   | 5 mg/mL, <b>80% methanol in water</b>                                      | Crystallite Micro rod                        |
|              | Methionine    | 33.8                     | 1 mg/mL, Water and <b>water:methanol (1:1)</b>                             | Micro crystallite arranged in Fern Structure |
|              | Cysteine      | 277.0                    | 1 mg/mL, Water and <b>water:methanol (1:1)</b>                             | <b>Globular</b> and elongated needle like    |
| Category II  | Serine        | 425.0                    | Water and <b>water:methanol (1:1) at each 50°C evaporation temperature</b> | Micro Capsule shape                          |
|              | Threonine     | 97.0                     | 1 mg/mL, <b>water</b>                                                      | Micro Spear                                  |
| Category III | Asparagine    | 29.4                     | 1 mg/mL, Water and <b>water:methanol (1:1)</b>                             | Micro Floral dendritic                       |
|              | Glutamine     | 41.3                     | 1 mg/mL, <b>water:methanol (1:1)</b>                                       | Micro Floral dendritic                       |
| Category IV  | Glutamic acid | 8.5                      | 1 mg/mL, <b>water</b>                                                      | Membrane like                                |
|              | Aspartic acid | 5.4                      | 1 mg/mL, Aqueous ammonia (0.1M)                                            | Membrane like                                |
| Category V   | Lysine        | 1000.0                   | 1 mg/mL, 0.1 M aqueous NaOH                                                | Crystalline rod                              |
|              | Arginine      | 182                      | 1 mg/mL, 0.1 M aqueous NaOH                                                | Crystalline needle                           |
|              | Histidine     | 45.6                     | 1 mg/mL, water:methanol (1:1), <b>aqueous pH 8.0 in methanol:water</b>     | Micro fibril                                 |

**Category I**

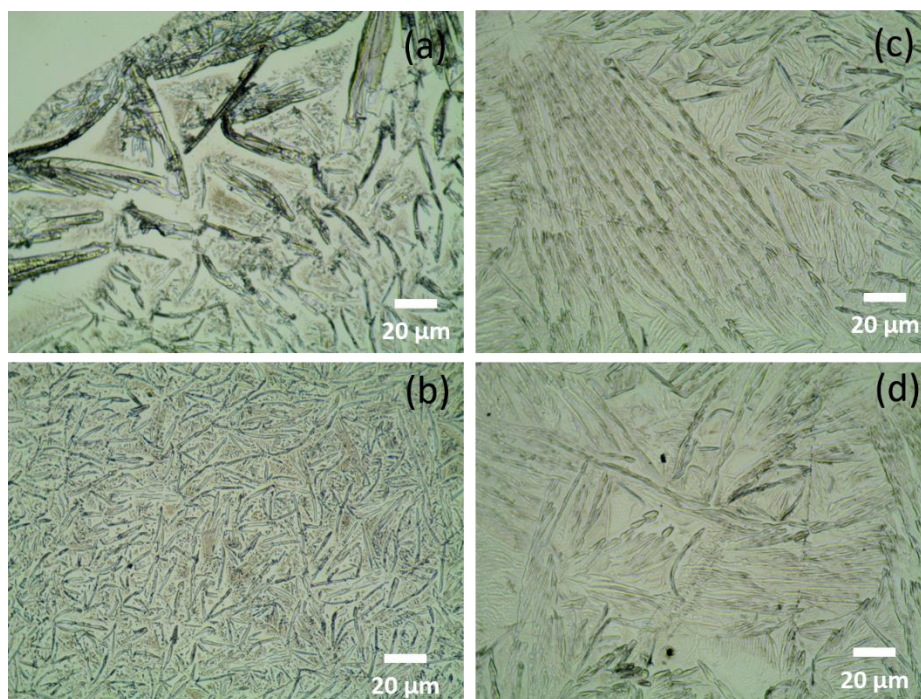

**Figure S1a: - Optical microscopy images for self assembly of glycine in water (a,b) and water methanol (1:1) solvent system (c,d) at 1 mg/mL concentration**

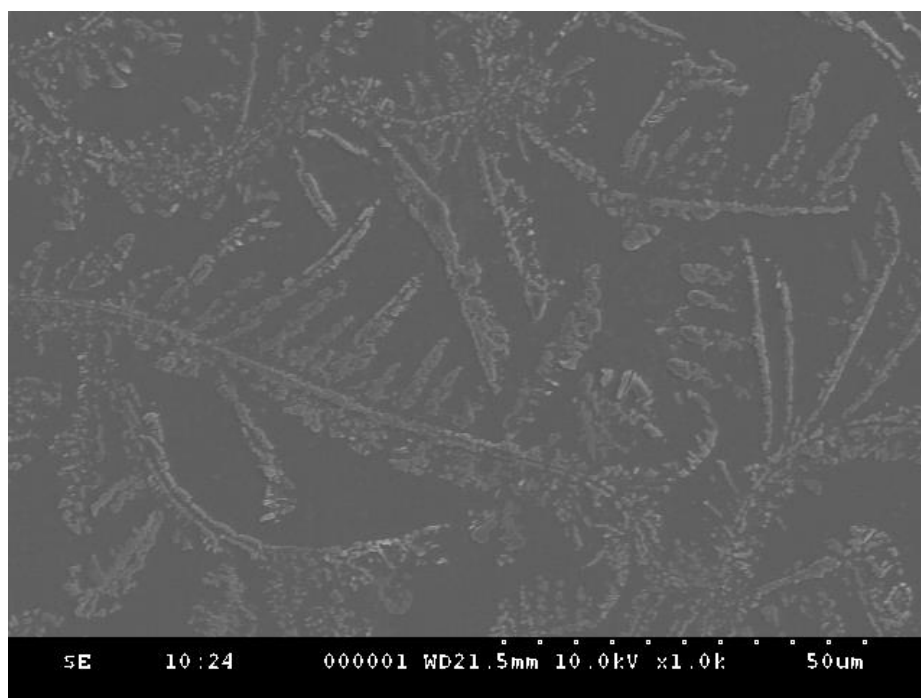

**Figure S1b: - FESEM image for self assembly of glycine in water methanol (1:1) solvent system at 1 mg/mL concentration**

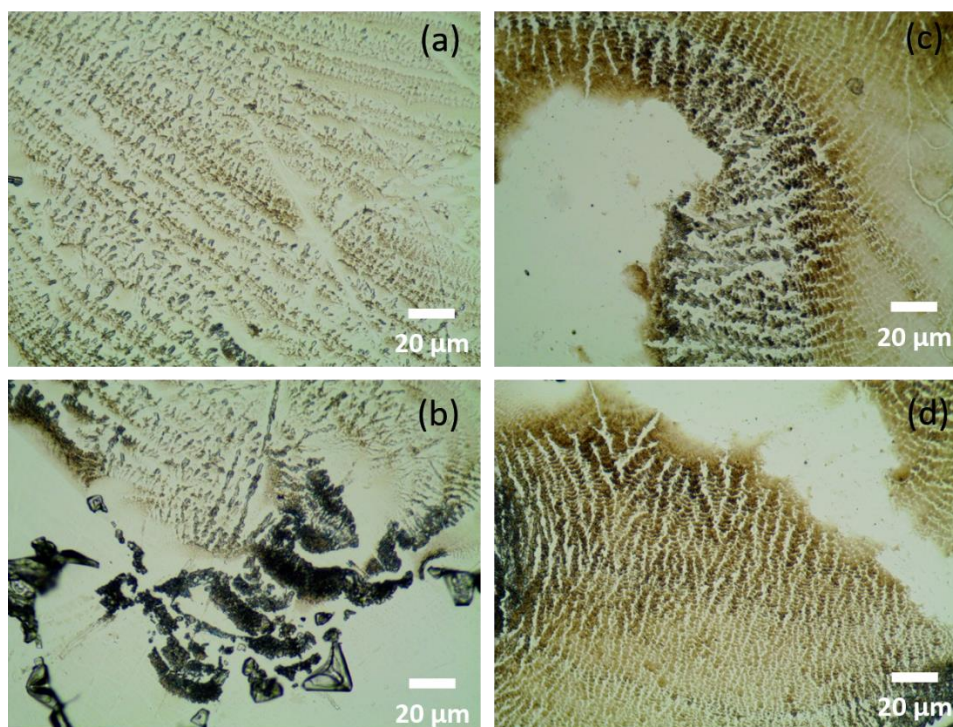

**Figure S2a: - Optical microscopy images for self assembly of alanine in water (a,b) and water methanol (1:1) solvent system (c,d) at 1 mg/mL concentration**

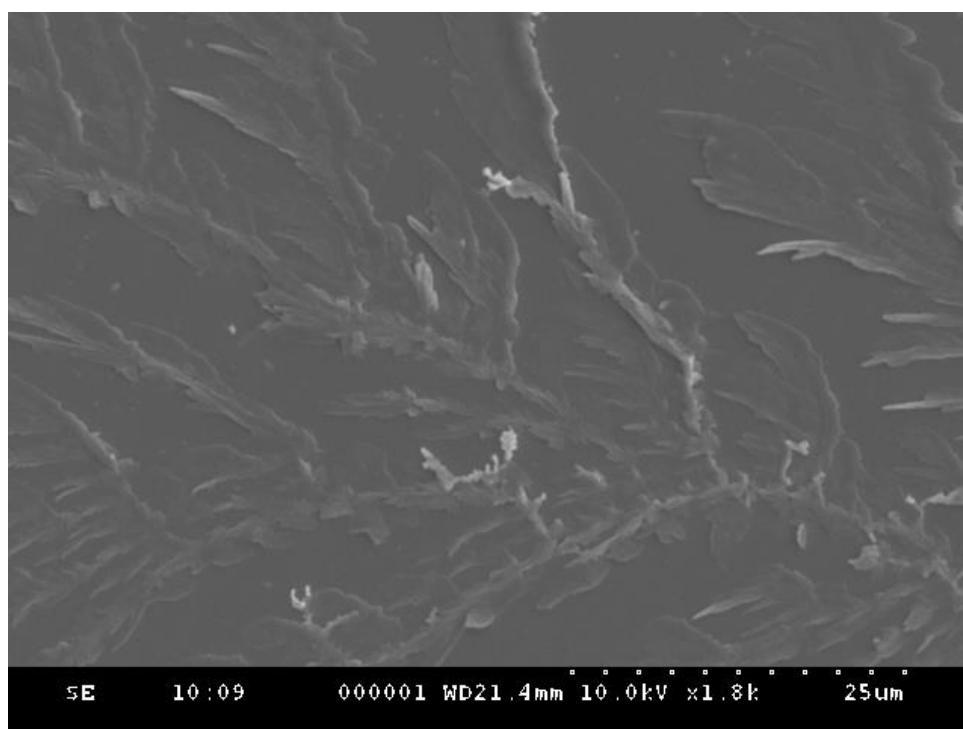

**Figure S2b: - FESEM image for self assembly of alanine in water methanol (1:1) solvent system at 1 mg/mL concentration**

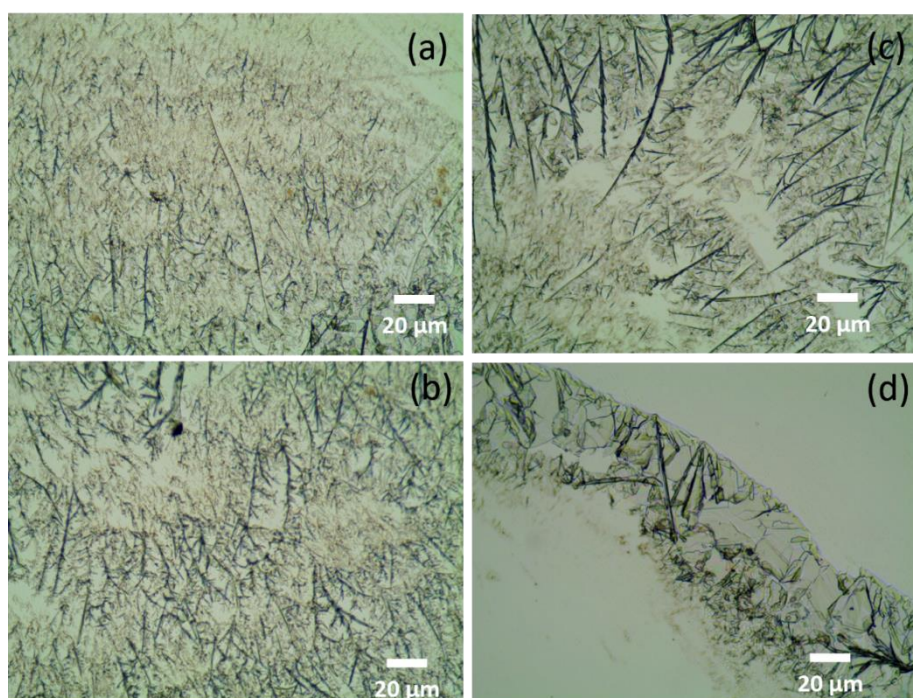

**Figure S3a: - Optical microscopy images for self assembly of leucine in water (a,b) and water methanol (1:1) solvent system (c,d) at 1 mg/mL concentration**

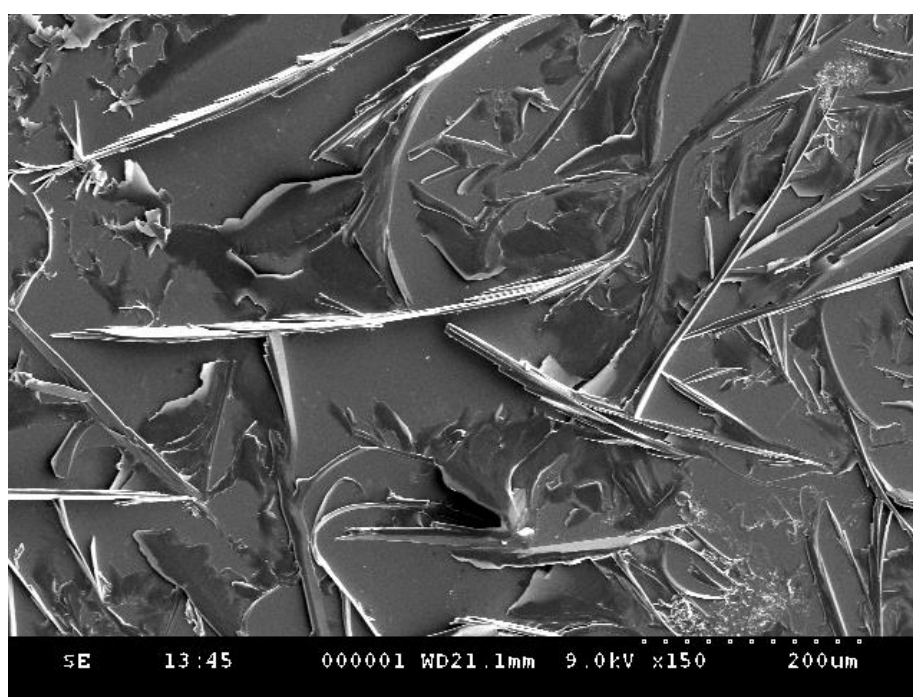

**Figure S3b: - FESEM image for self assembly of leucine in water methanol (1:1) solvent system at 1 mg/mL concentration**

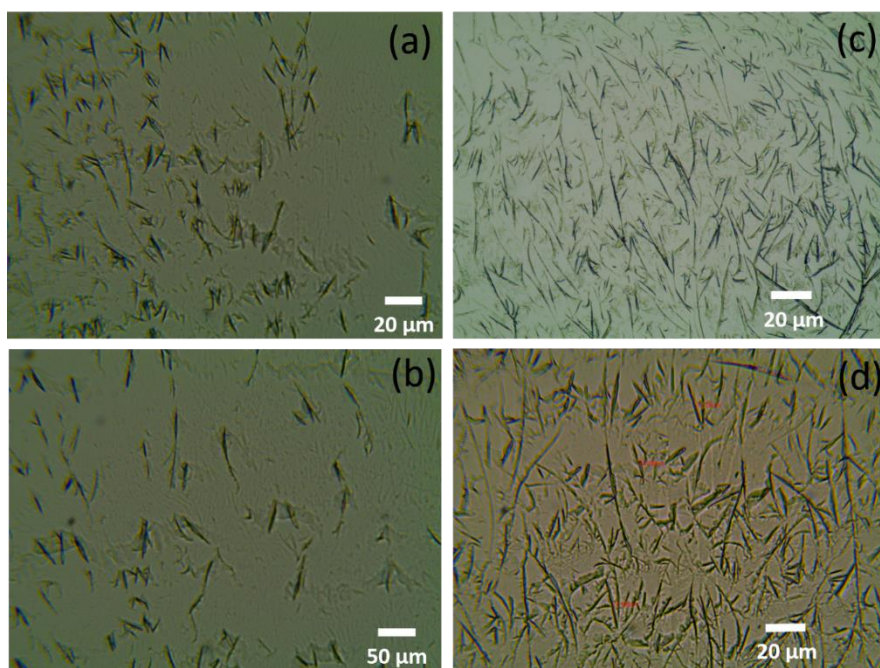

**Figure S4a: - Optical microscopy images for self assembly of isoleucine in water (a,b) and water methanol (1:1) solvent system (c,d) at 1 mg/mL concentration**

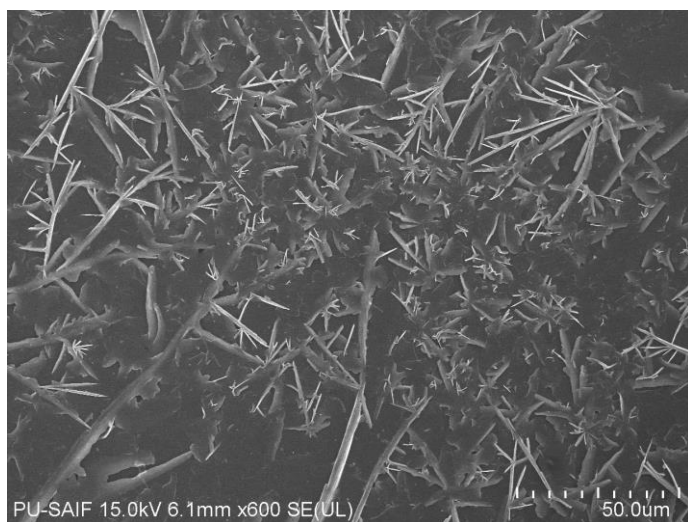

**Figure S4b: - FESEM image for self assembly of isoleucine in water methanol (1:1) solvent system at 1 mg/mL concentration**

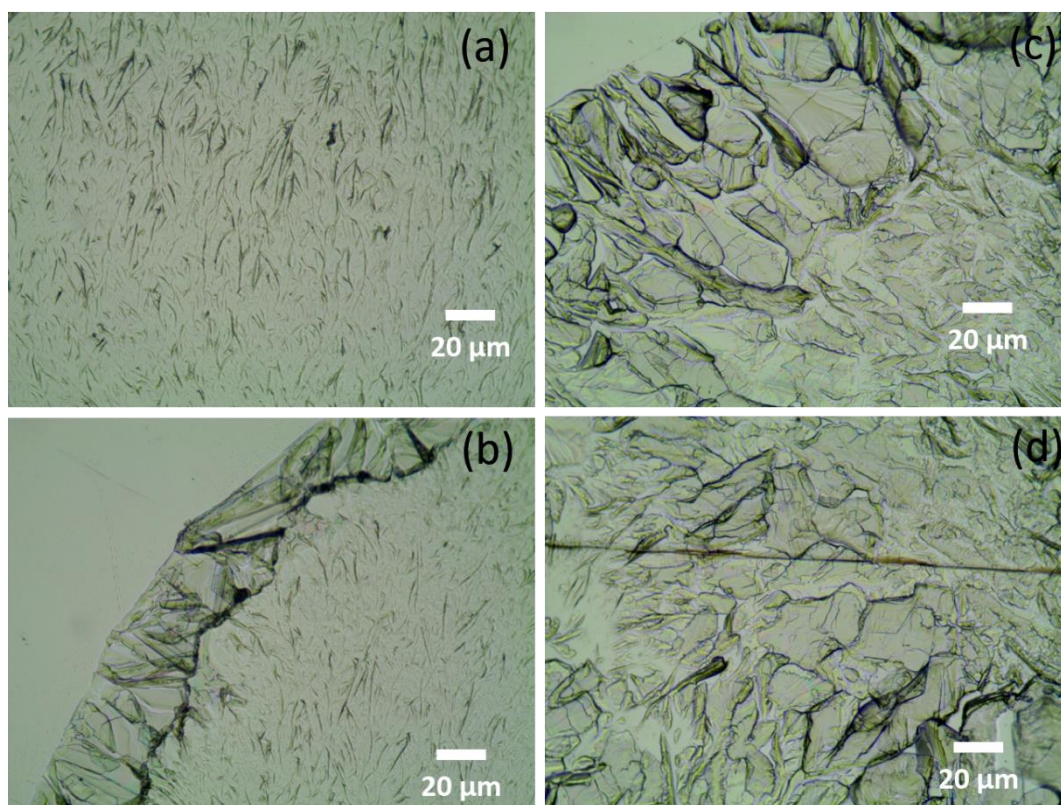

**Figure S5a: Optical microscopy image for self assembly of valine in water (a,b) and water methanol (1:1) solvent system (c,d) at 1 mg/mL concentration**

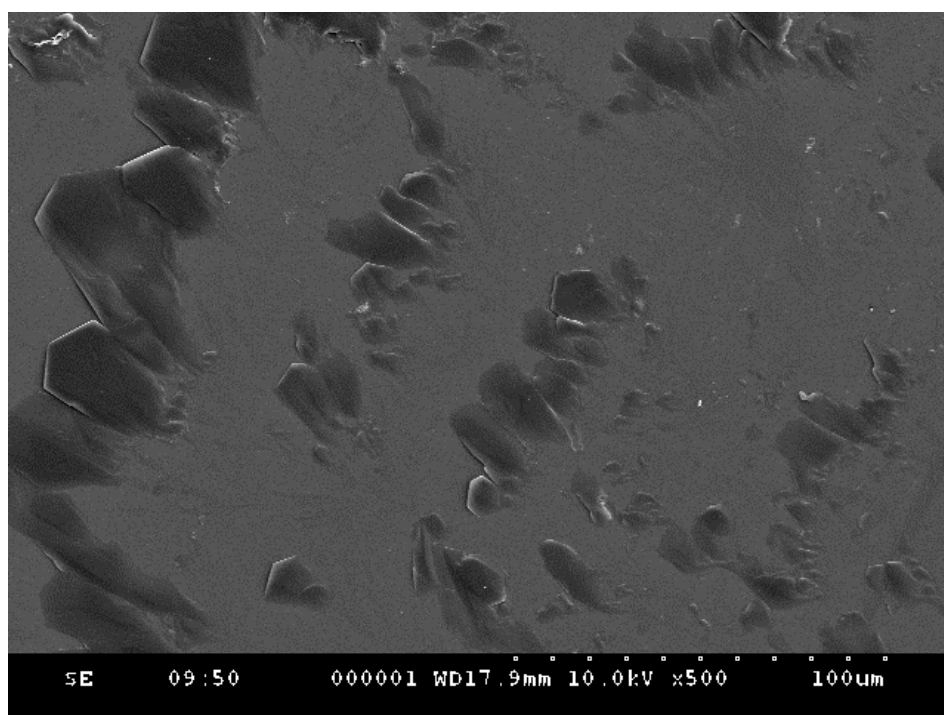

**Figure S5b: - FESEM image for self assembly of valine in water at 1 mg/mL concentration**



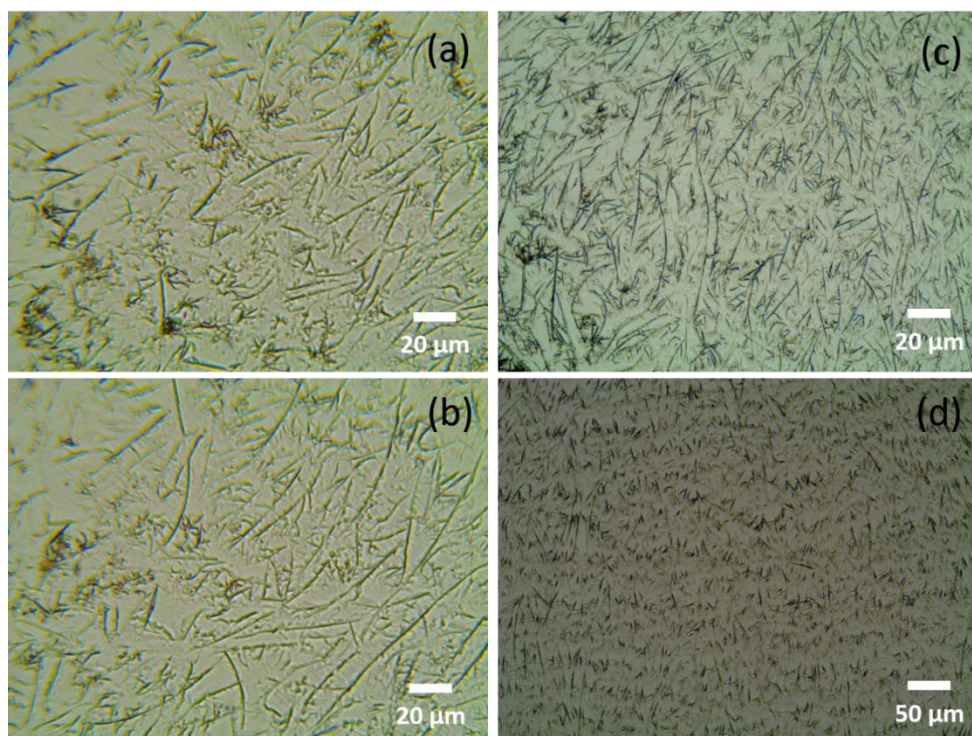

**Figure S6a: - Optical microscopy image for self assembly of methionine in water (a,b) and water methanol (1:1) solvent system (c,d) at 1 mg/mL concentration**

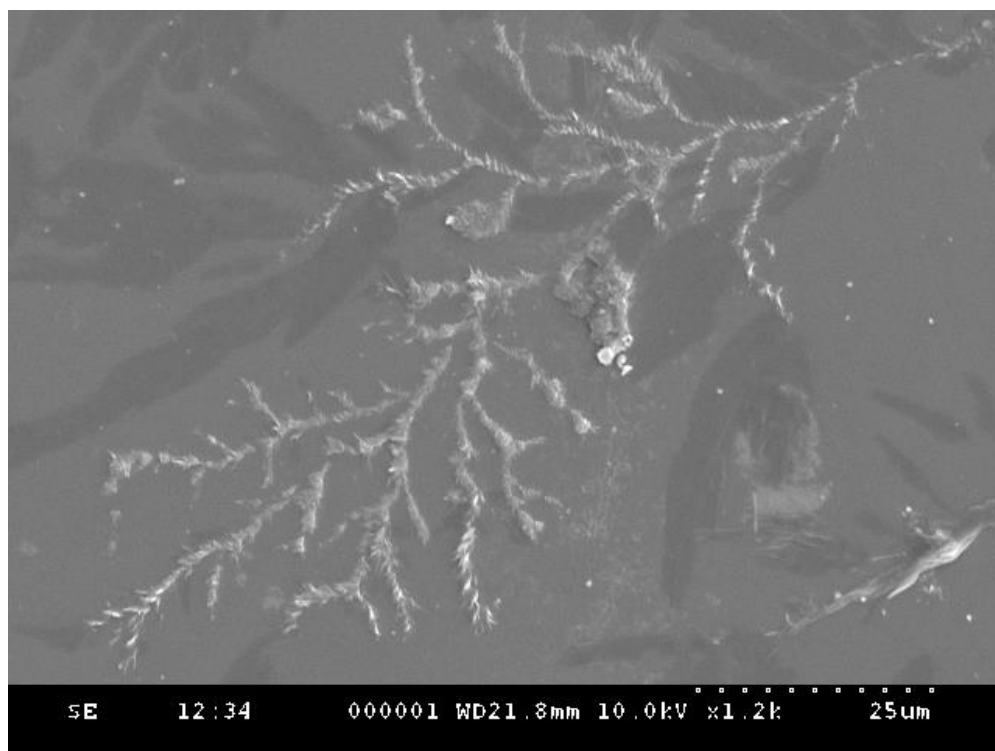

**Figure S6b: - FESEM image for self assembly of methionine in water:methanol (1:1) solvent system at 1 mg/mL concentration**

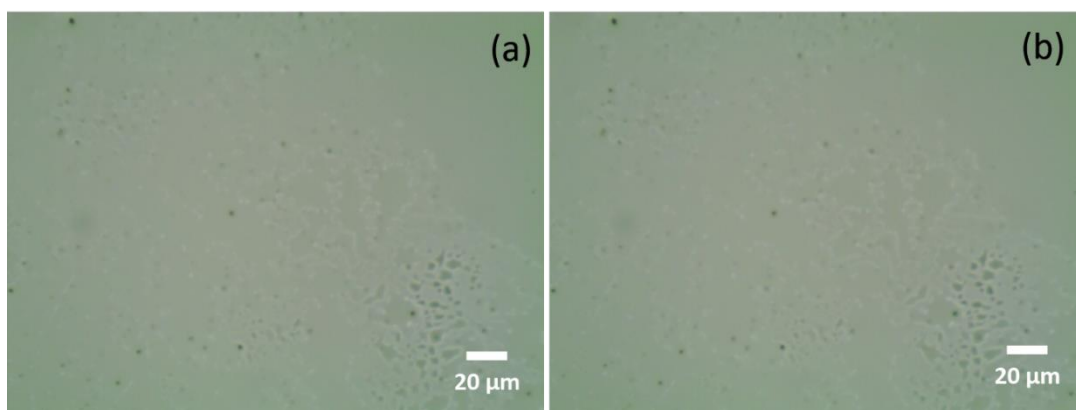

**Figure S7a: Optical microscopy image for self assembly of proline in water (a) and in methanol (1:1) solvent (b) system at 1 mg/mL concentration.**

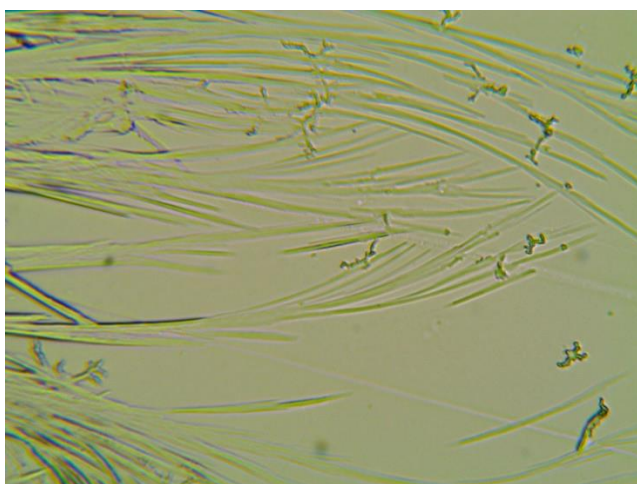

**Figure S7b: Optical microscopy image for self assembly of proline in 80 % methanol in water solvent system at 5 mg/mL concentration.**

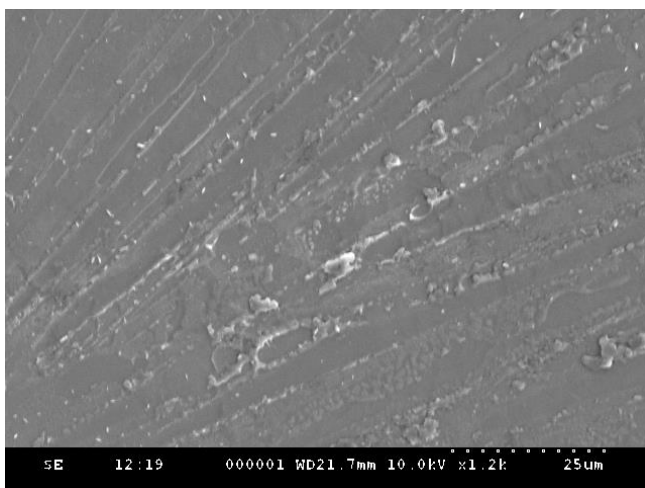

**Figure S7c: - FESEM image for self assembly of proline in 80 % methanol in water solvent system at 5 mg/mL concentration.**

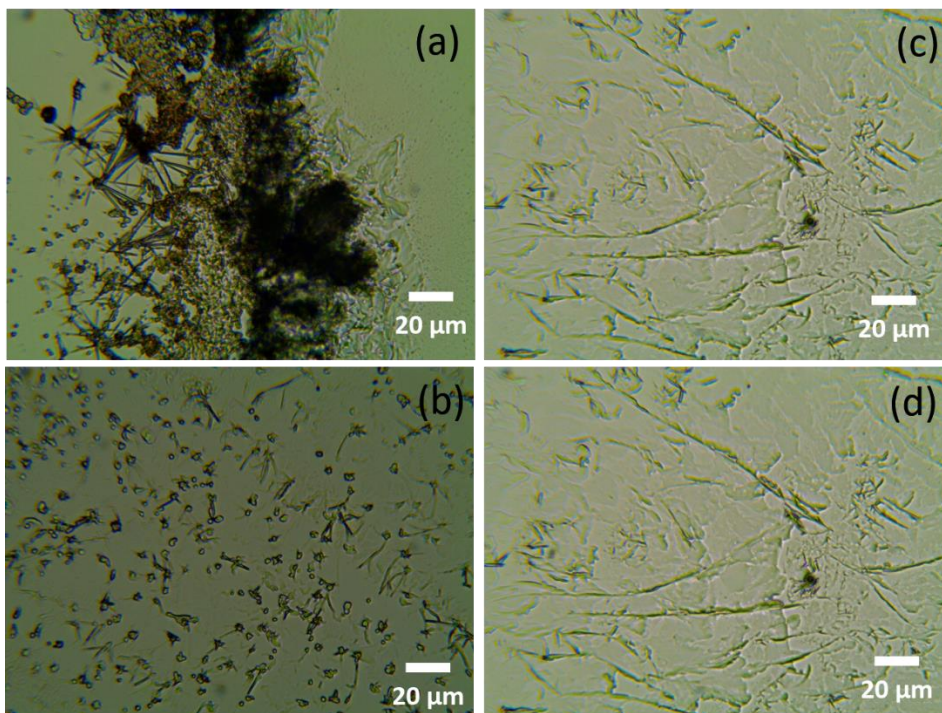

**Figure S8a: Optical microscopy image for self assembly of cysteine in water (a,b) and water methanol (1:1) solvent system (c,d) at 1 mg/mL concentration**

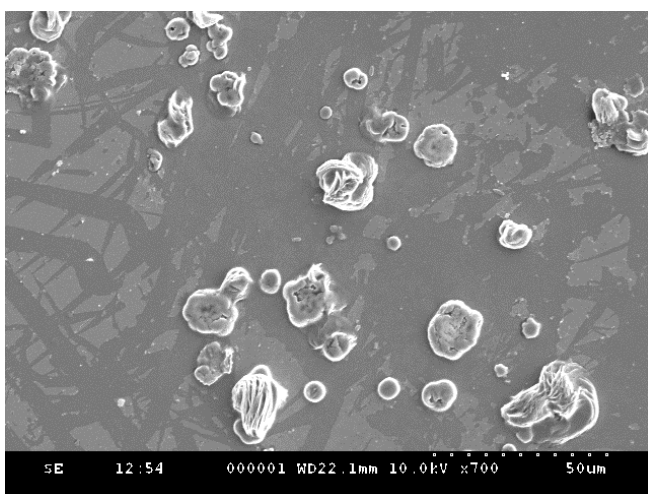

**Figure S8b: FESEM image for self assembly of cysteine in water at 1 mg/mL concentration**

**Category II**

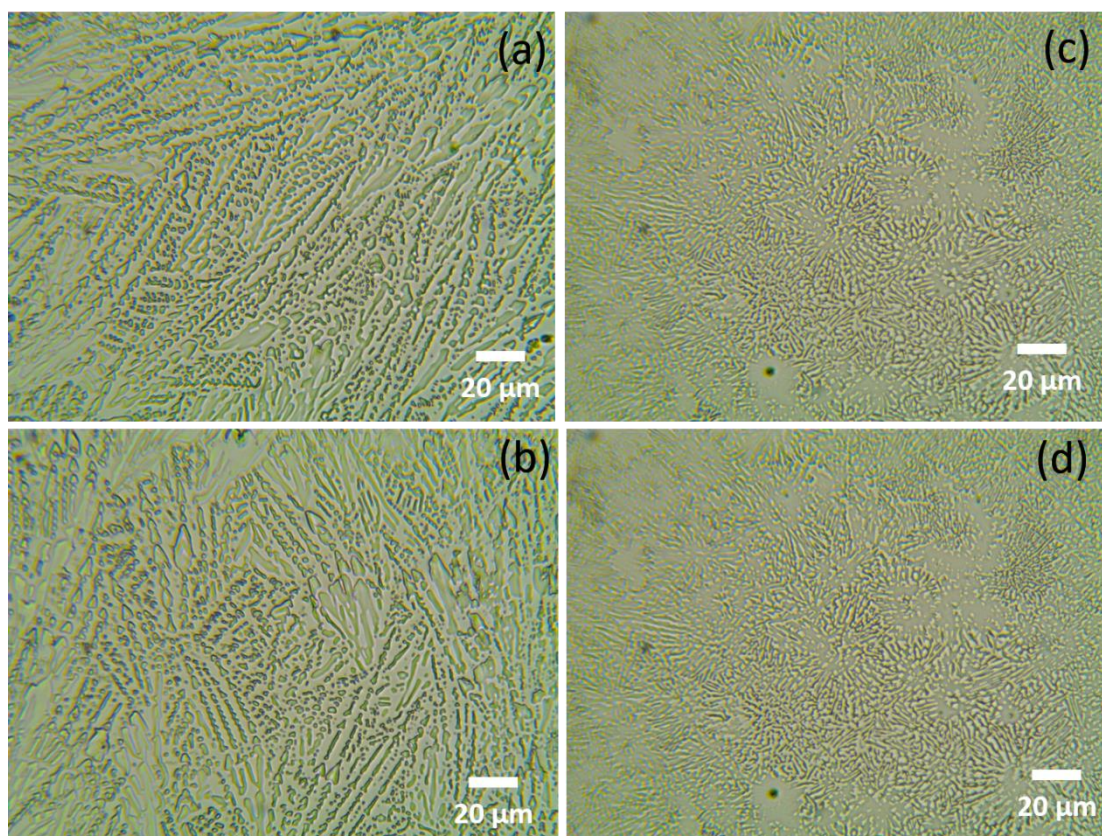

**Figure S9a: - Optical images for self assembly of threonine in water (a,b) and water methanol (1:1) solvent system (c,d) at 1 mg/mL concentration**

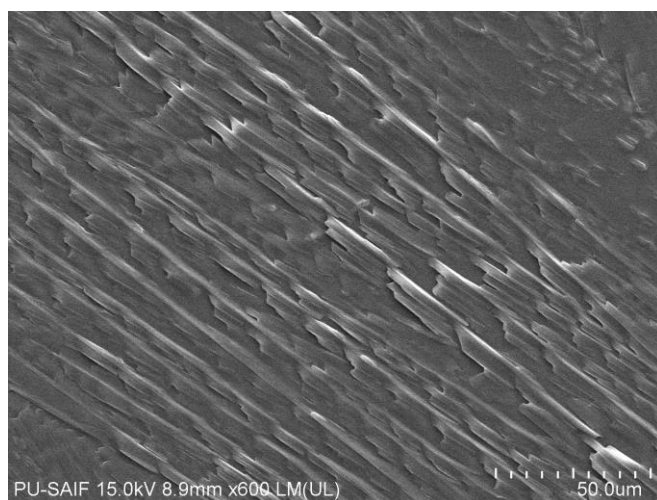

**Figure S9b: - FESEM image for self assembly of threonine in water at 1 mg/mL concentration**

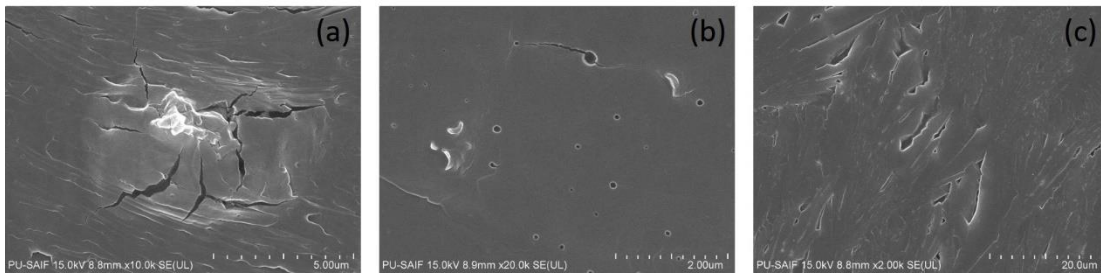

**Figure S10a: - Self assembly of serine in water (a,b) and water methanol (1:1) solvent system (c,d) at 1 mg/mL concentration**

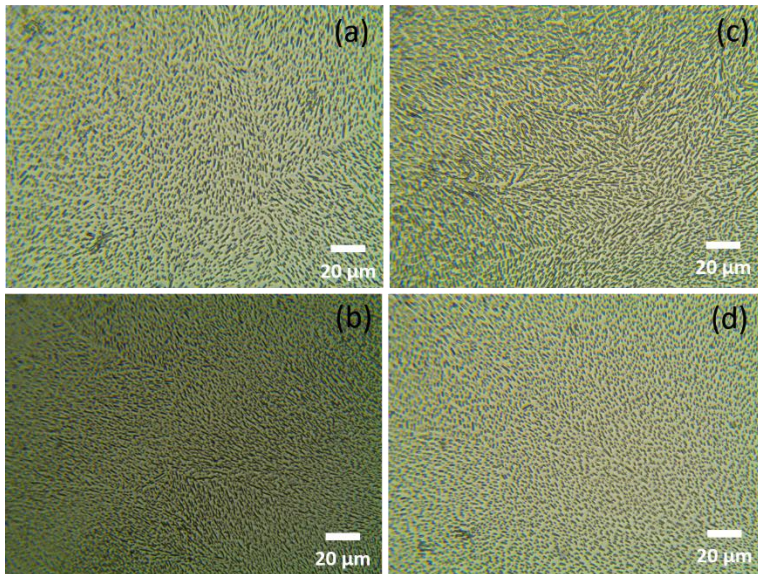

**Figure S10b: - Self assembly of serine in water (a,b) and water methanol (1:1) solvent system (c,d) at 1 mg/mL concentration**

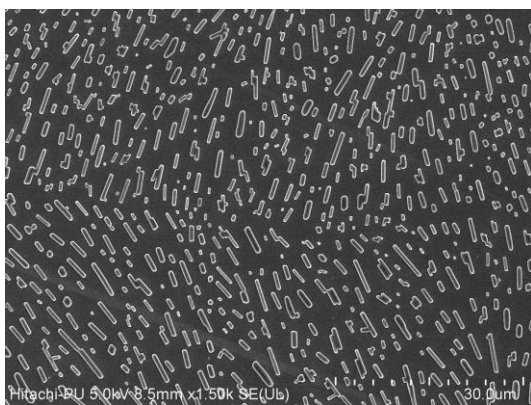

**Figure S10c: - FESEM image for self assembly of serine in water at 1 mg/mL concentration**

**Category III**

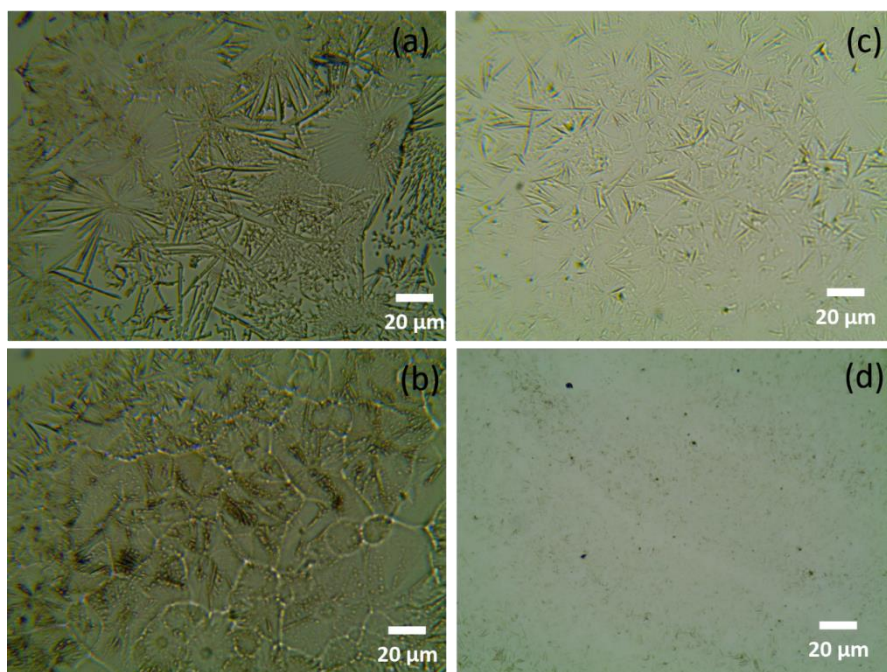

**Figure S11a: - Optical images for self assembly of asparagine in water (a,b) and water methanol (1:1) solvent system (c,d) at 1 mg/mL concentration**

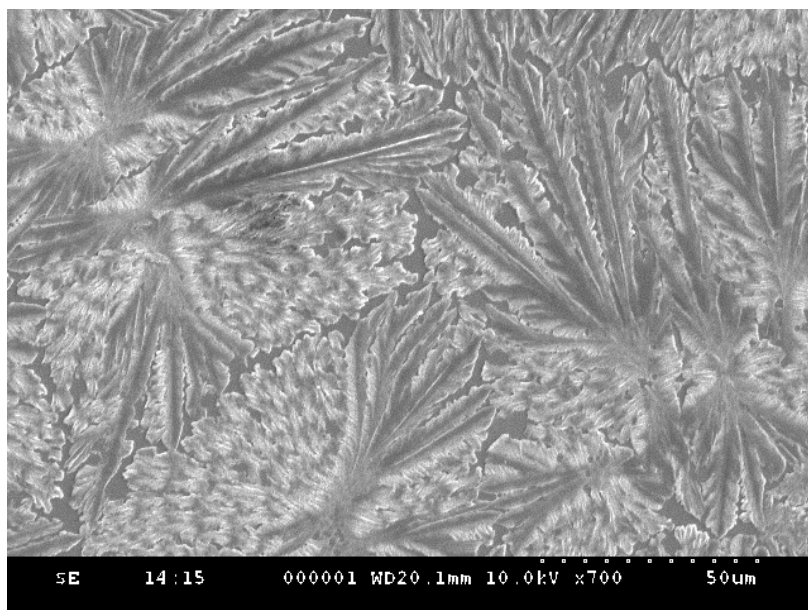

**Figure S11b: - FESEM image for self assembly of asparagine in water at 1 mg/mL concentration**

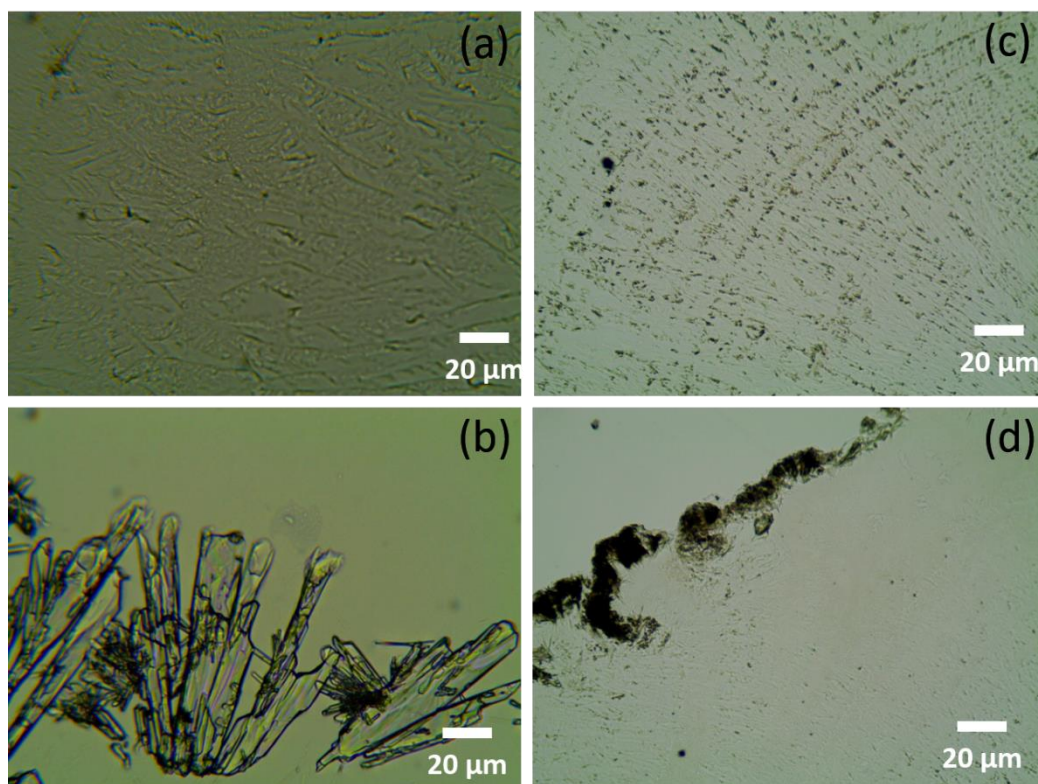

**Figure S12a: - Self assembly of glutamine in water (a,b) and water methanol (1:1) solvent system (c,d) at 1 mg/mL concentration**

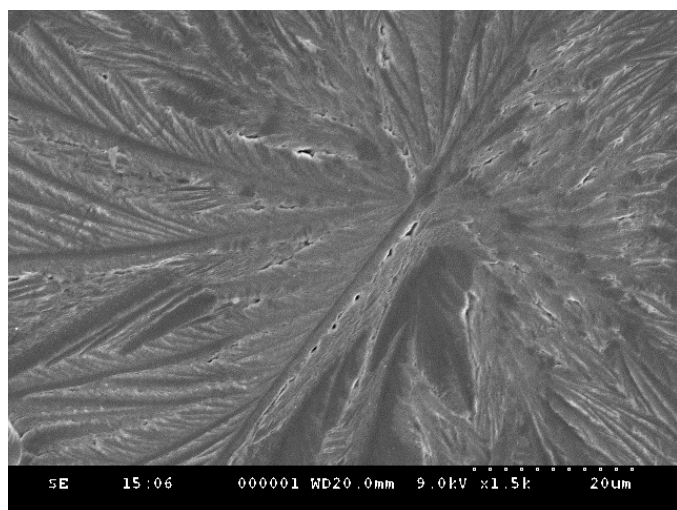

**Figure S12b: - FESEM image for self assembly of glutamine in water at 1 mg/mL concentration**

## Category IV

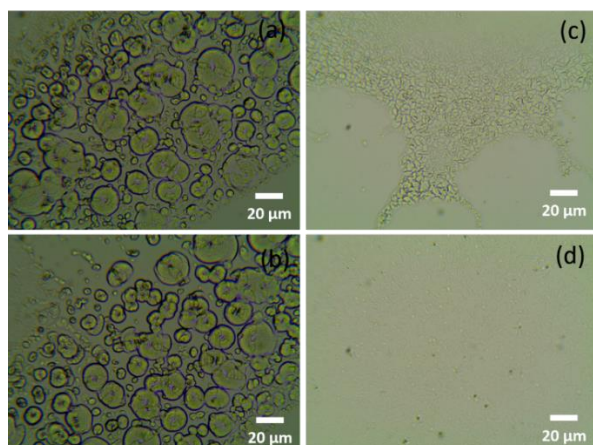

**Figure S13a: - Self assembly of glutamine acid in water (a,b) and water methanol (1:1) solvent system (c,d) at 1 mg/mL concentration**

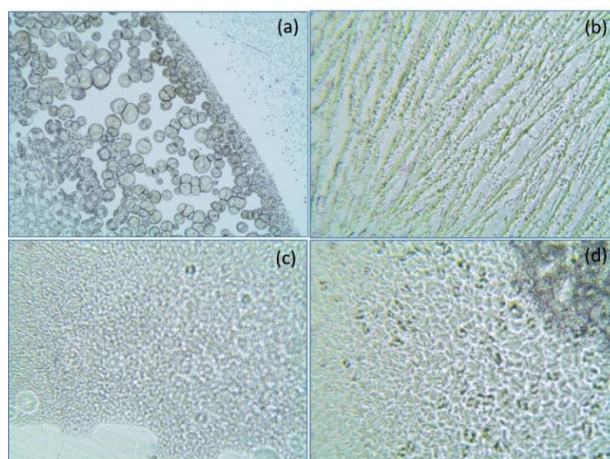

**Figure S13b: - Optical microscopy images for self assembly of glutamic acid in 0.1 M HCl (a); 0.1 M NaOH (b). 0.1 M AcOH (c) and 0.1 M NH<sub>3</sub>**

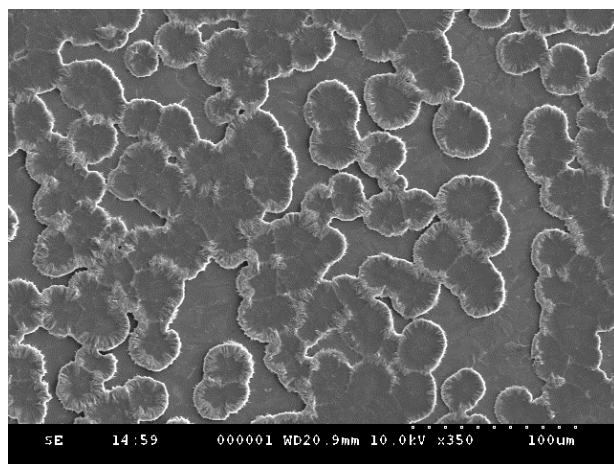

**Figure S13c: - FESEM image for self assembly of glutamic acid in 0.1 M aqueous NH<sub>3</sub> solvent system at 1 mg/mL concentration**



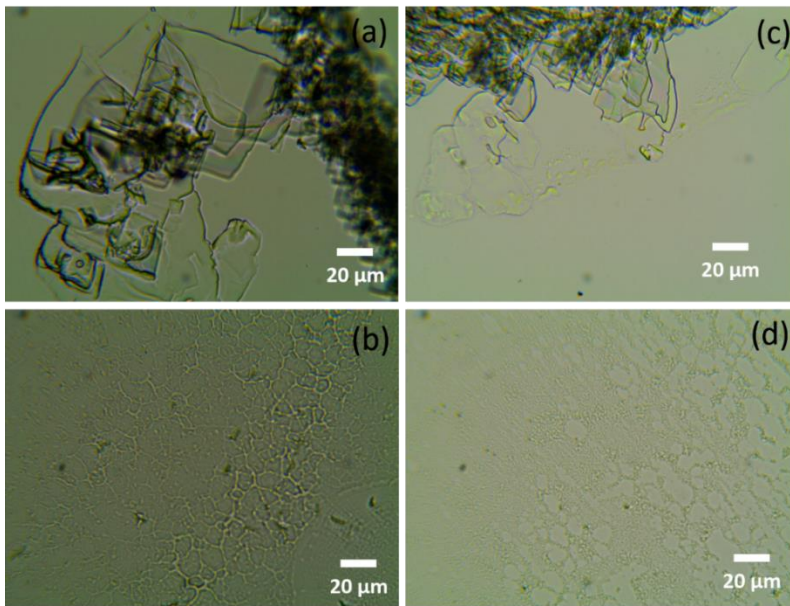

**Figure S14a: - Optical images for self assembly of aspartic acid in water (a,b) and water methanol (1:1) solvent system (c,d) at 1 mg/mL concentration**

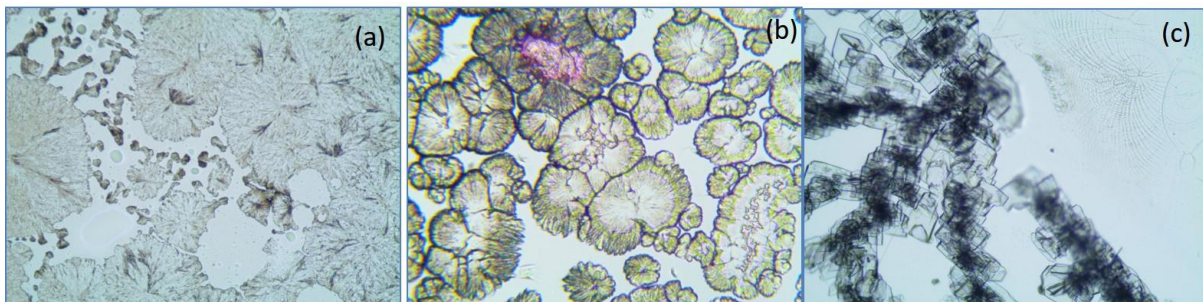

**Figure 14b: - Optical microscopic images for self-assembly of aspartic acid in 0.1 M HCl (a); 0.1 M NH<sub>3</sub> (b); and 0.1 M AcOH.**

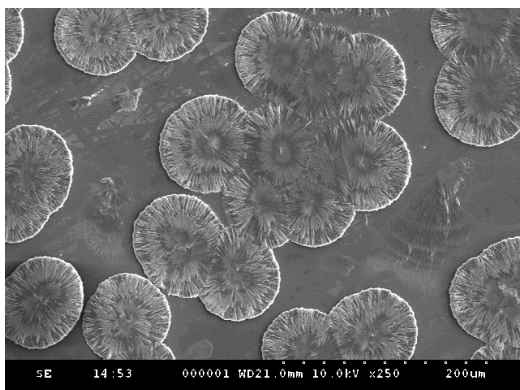

**Figure 14c: - FESEM image for self-assembly of aspartic acid in 0.1 M NH<sub>3</sub> n aqueous medium**

*Category V*

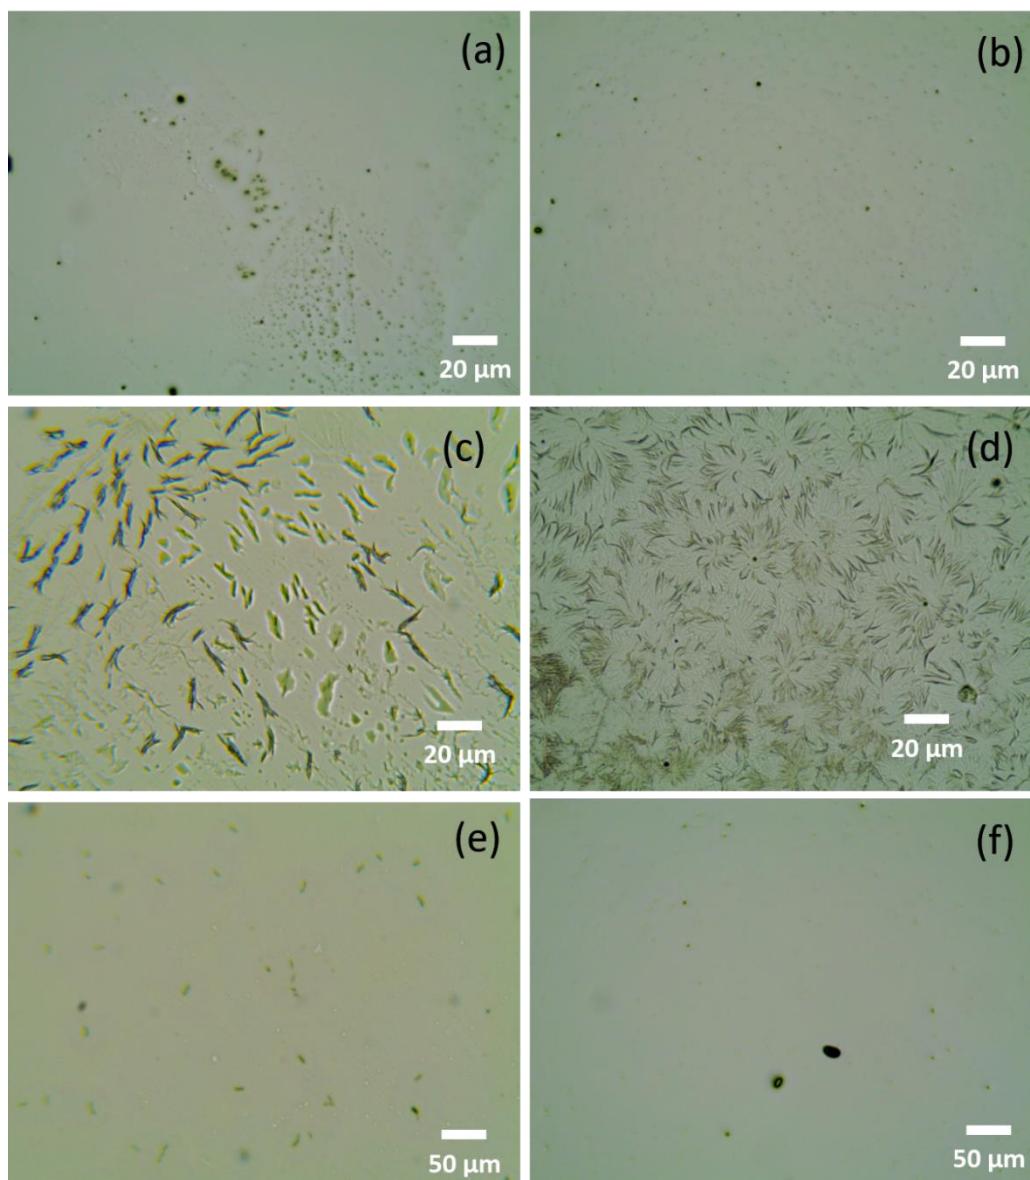

**Figure S15: Self assembly of arginine, histidine and lysine in water (a, c and e, respectively) and in methanol (1:1) solvent (b, d and f, respectively) system at 1 mg/mL concentration**

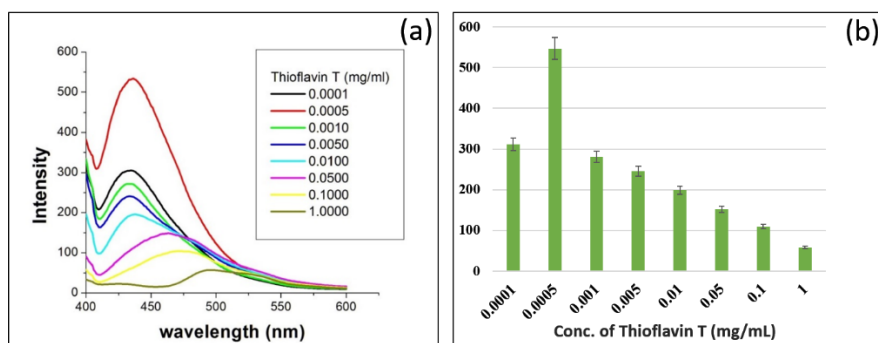

**Figure S16: - Optimization of ThT concentration for maximum emission intensity in aqueous medium**

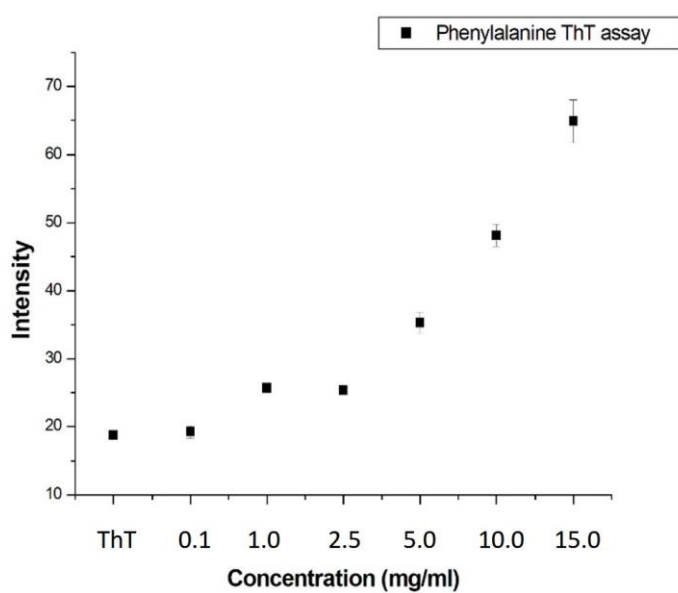

**Figure S17: - Optimization of phenylalanine concentration for ThT fluorescence assay using optimized ThT concentration in aqueous medium**

*Phenylalanine and amino acid co-assembled structures*

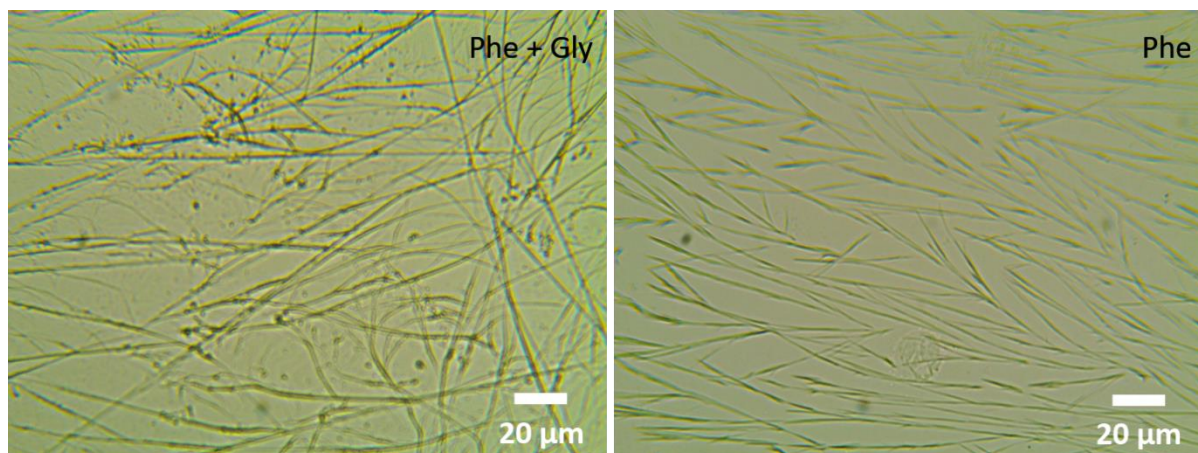

**Figure S18:** - Optical images for self-assembly of co-assembled phenylalanine:glycine (1mg/mL and 0.5 mg/mL, respectively) and only phenylalanine in aqueous medium

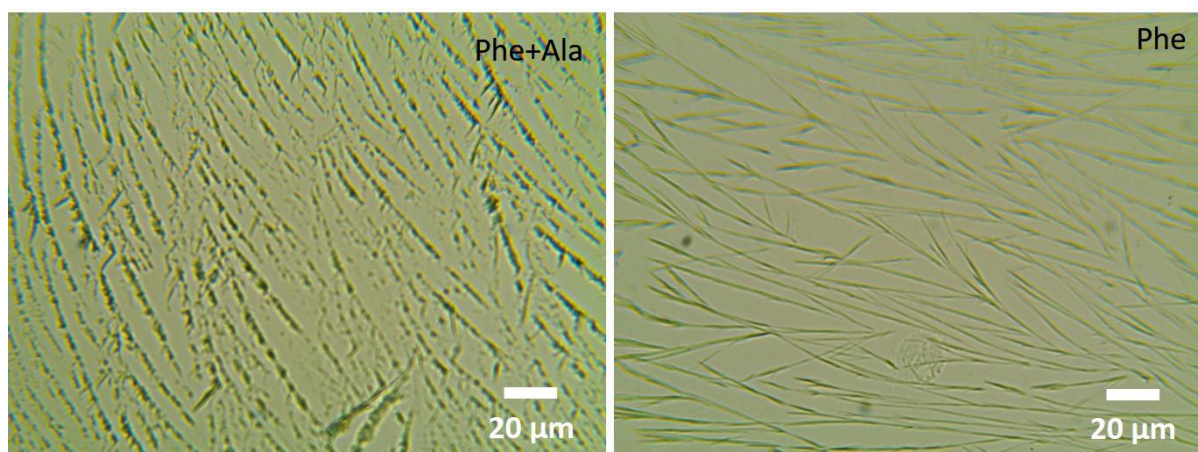

**Figure S19:** - Optical images for self-assembly of co-assembled phenylalanine:alanine (1mg/mL and 0.5 mg/mL, respectively) and only phenylalanine in aqueous medium

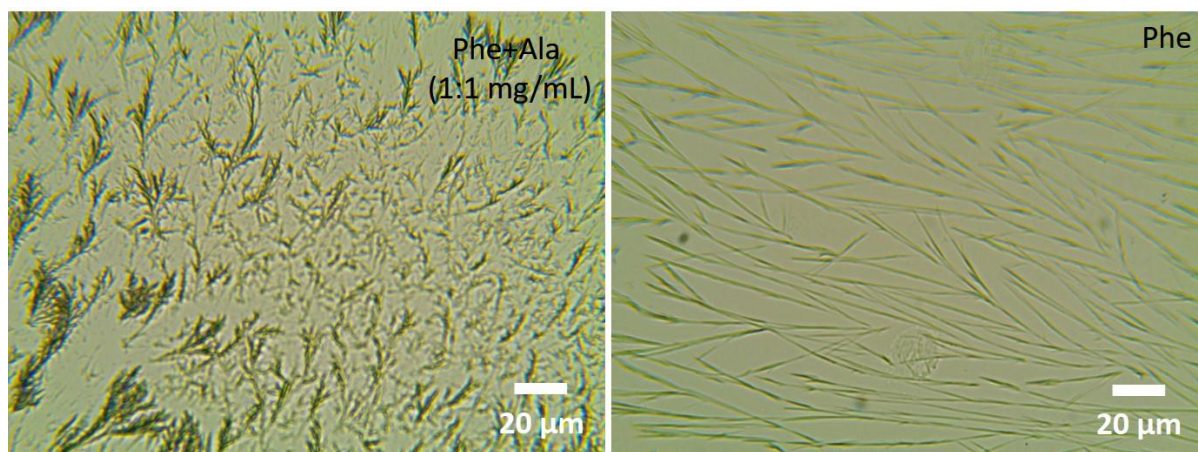

**Figure S20: - Optical images for self-assembly of co-assembled phenylalanine:alanine (1mg/mL and 1 mg/mL, respectively) and only phenylalanine in aqueous medium**

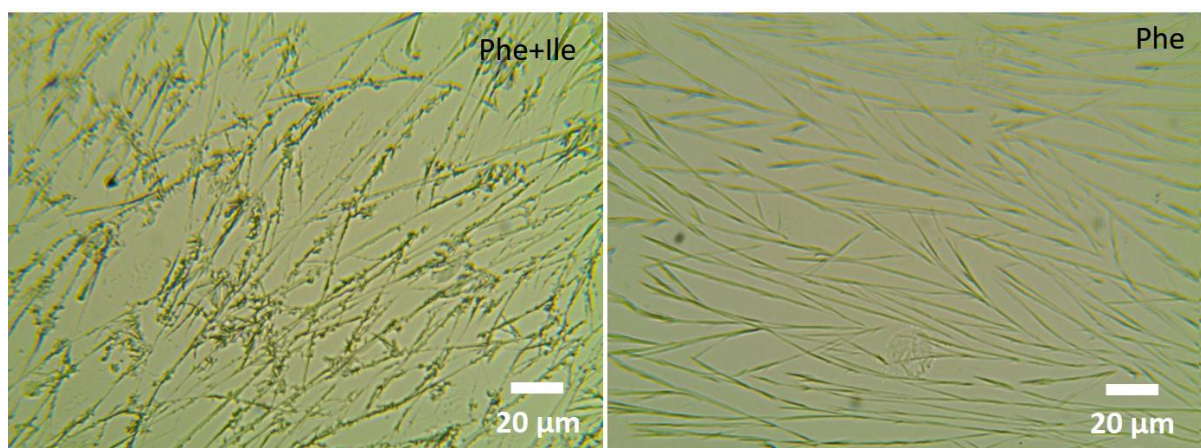

**Figure S21: - Optical images for self-assembly of co-assembled phenylalanine:isoleucine (1mg/mL and 0.5 mg/mL, respectively) and only phenylalanine in aqueous medium**

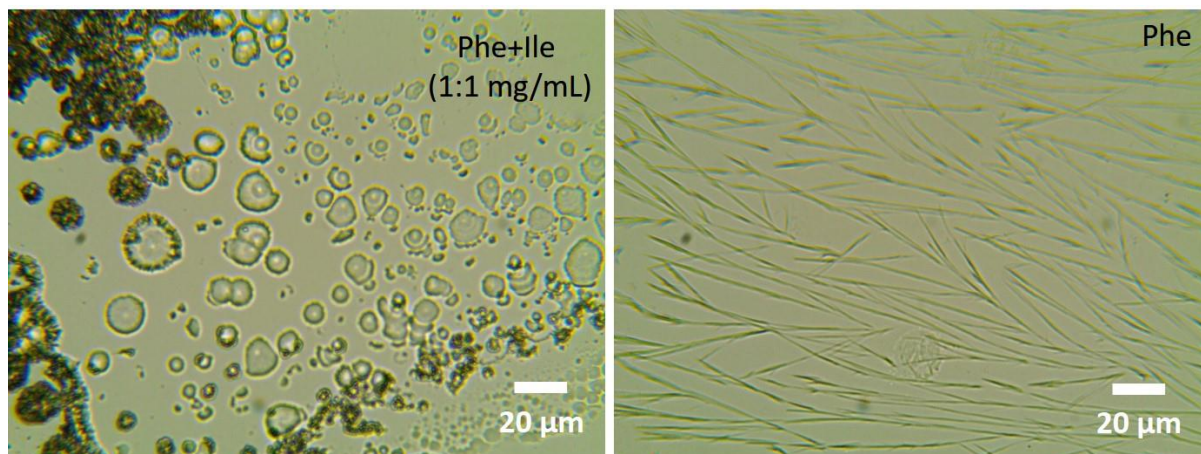

**Figure S22: - Optical images for self-assembly of co-assembled phenylalanine:isoleucine (1mg/mL and 1 mg/mL, respectively) and only phenylalanine in aqueous medium**

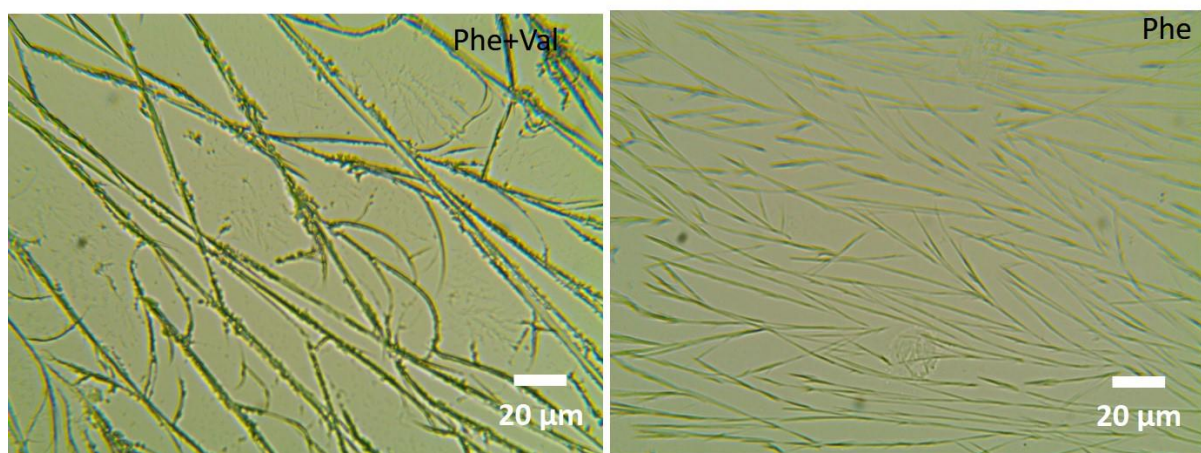

**Figure S23: - Optical images for self-assembly of co-assembled phenylalanine:valine (1mg/mL and 0.5 mg/mL, respectively) and only phenylalanine in aqueous medium**

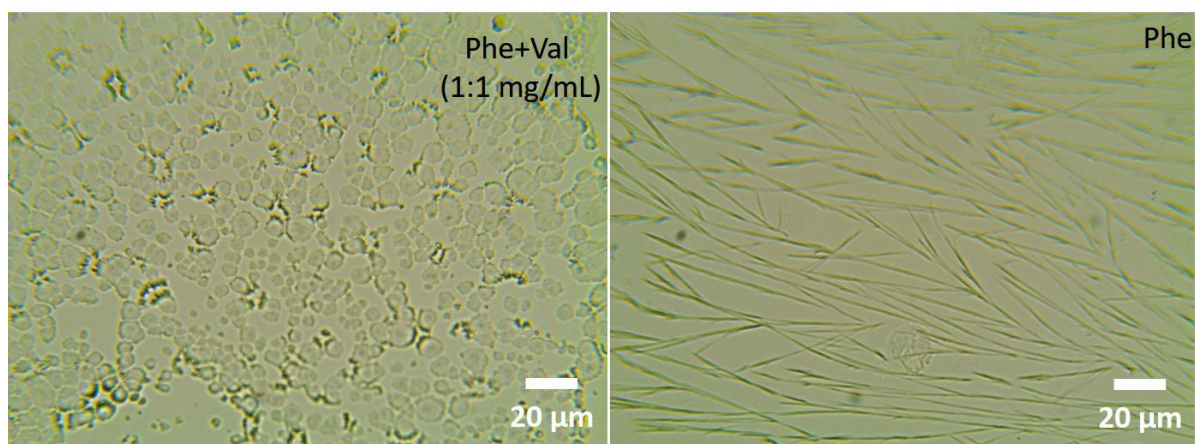

**Figure S24: - Optical images for self-assembly of co-assembled phenylalanine:valine (1mg/mL and 1 mg/mL, respectively) and only phenylalanine in aqueous medium**

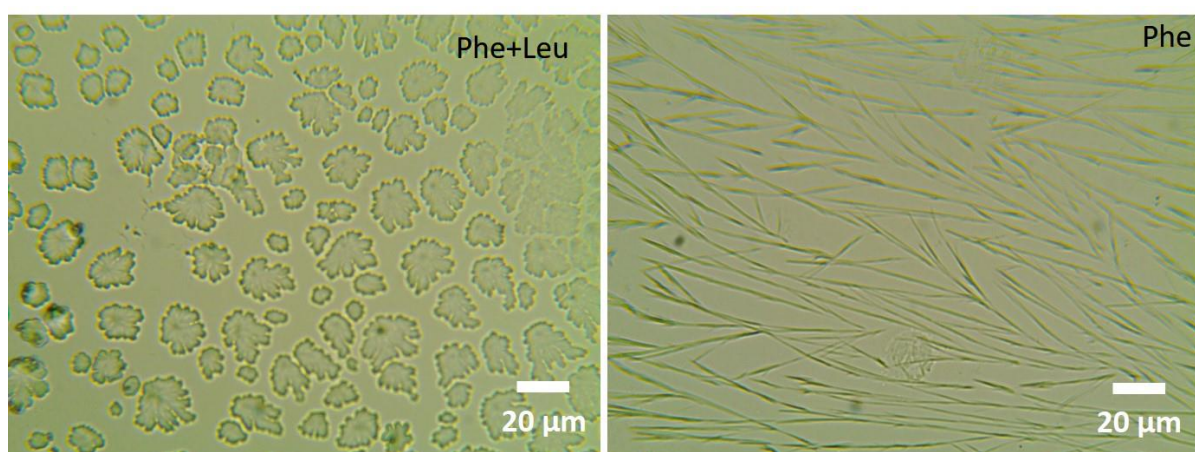

**Figure S25: - Optical images for self-assembly of co-assembled phenylalanine:leucine (1mg/mL and 0.5 mg/mL, respectively) and only phenylalanine in aqueous medium**

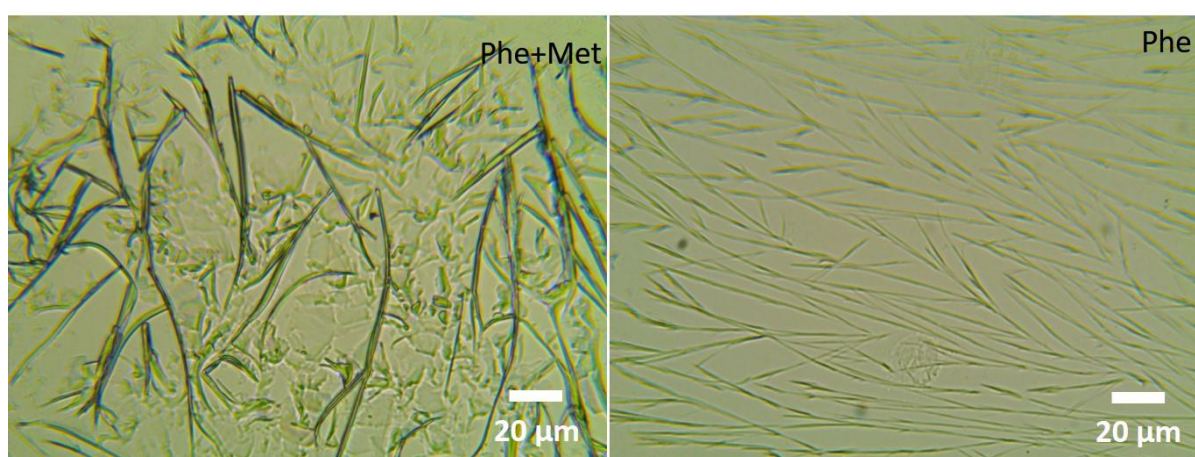

**Figure S26: - Optical images for self-assembly of co-assembled phenylalanine:methionine (1mg/mL and 0.5 mg/mL, respectively) and only phenylalanine in aqueous medium**

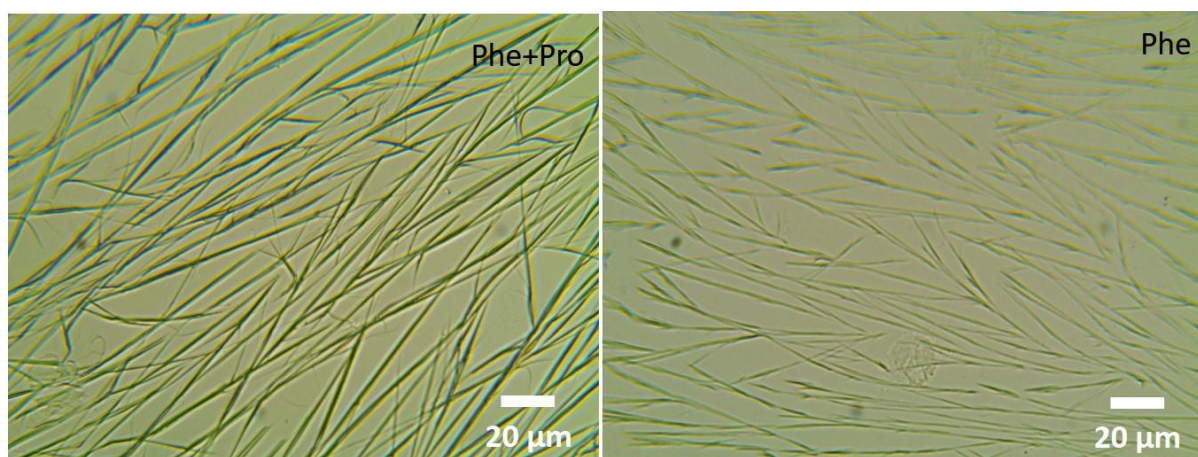

**Figure S27: - Optical images for self-assembly of co-assembled phenylalanine:proline (1mg/mL and 0.5 mg/mL, respectively) and only phenylalanine in aqueous medium**

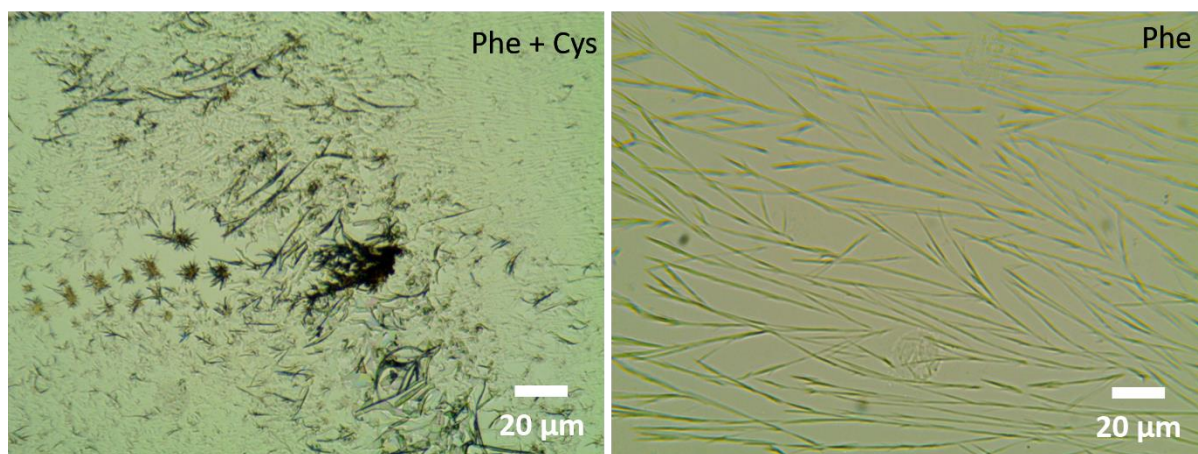

**Figure S28: - Optical images for self-assembly of co-assembled phenylalanine:cysteine (1mg/mL and 0.5 mg/mL, respectively) and only phenylalanine in aqueous medium**

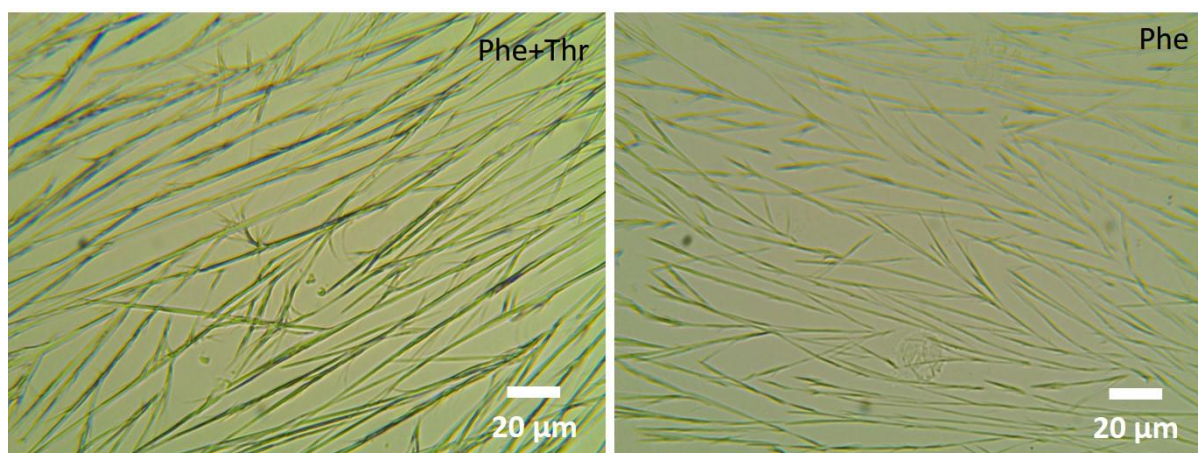

**Figure S29: - Optical images for self-assembly of co-assembled phenylalanine:threonine (1mg/mL and 0.5 mg/mL, respectively) and only phenylalanine in aqueous medium**

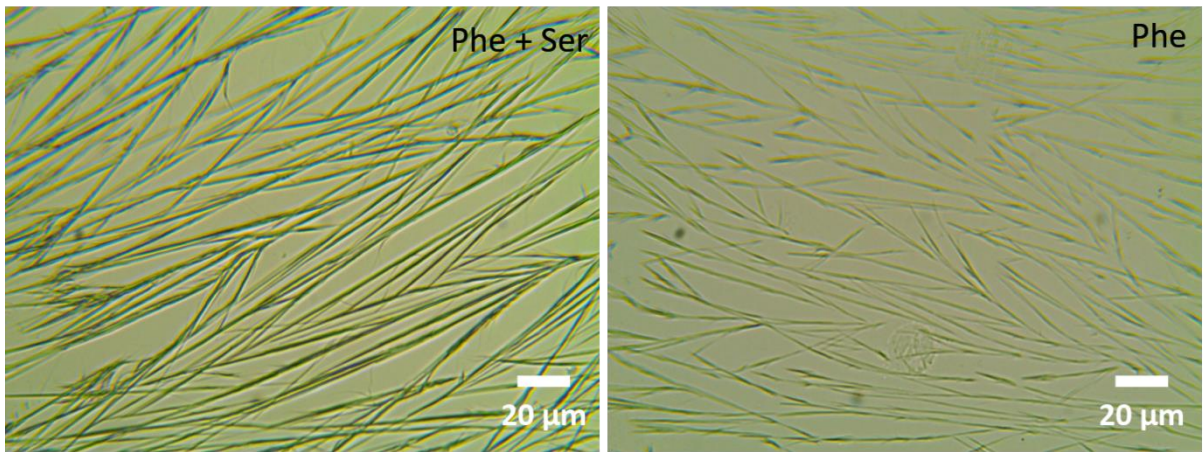

**Figure S30: - Optical images for self-assembly of co-assembled phenylalanine:serine (1mg/mL and 0.5 mg/mL, respectively) and only phenylalanine in aqueous medium**

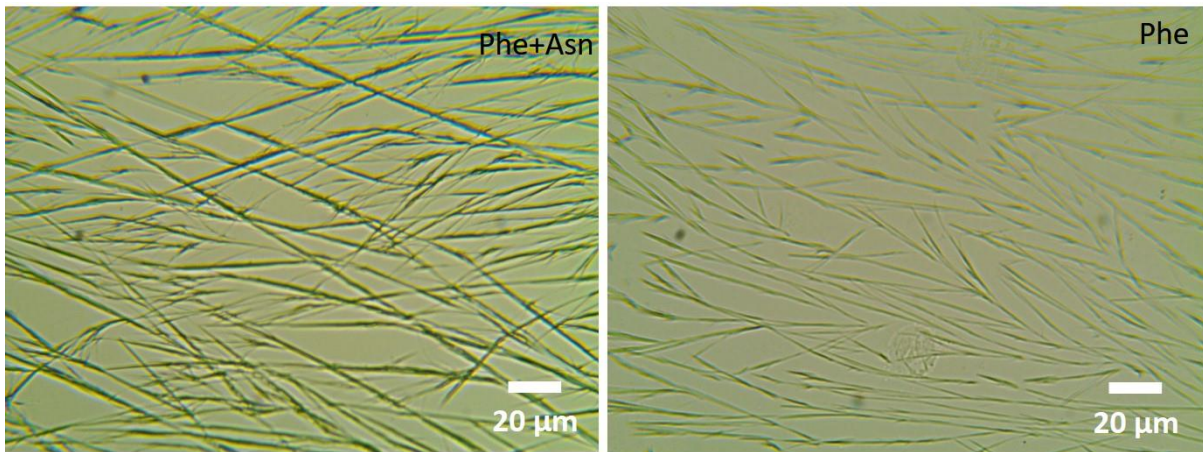

**Figure S31: - Optical images for self-assembly of co-assembled phenylalanine:asparagine (1mg/mL and 0.5 mg/mL, respectively) and only phenylalanine in aqueous medium**

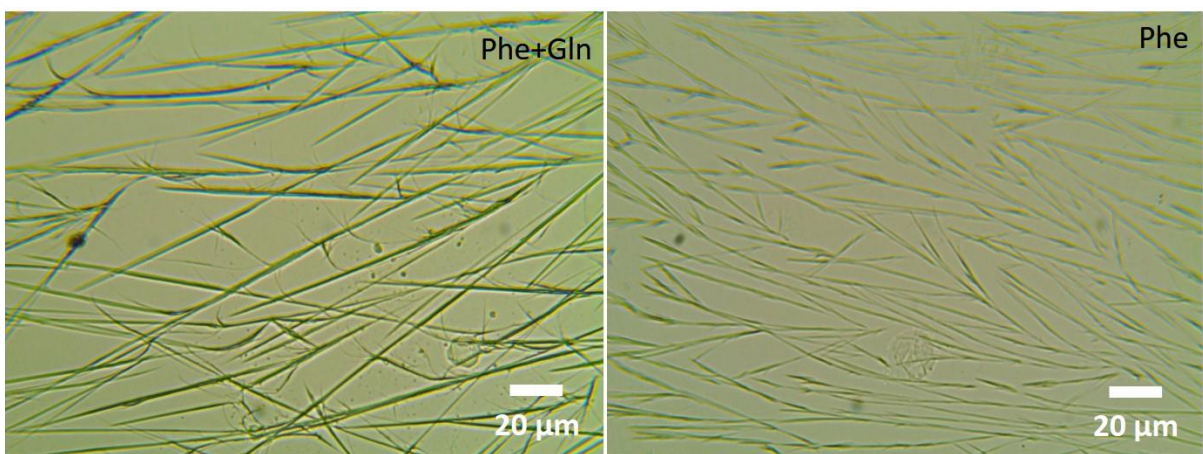

**Figure S32: - Optical images for self-assembly of co-assembled phenylalanine:glutamine (1mg/mL and 0.5 mg/mL, respectively) and only phenylalanine in aqueous medium**



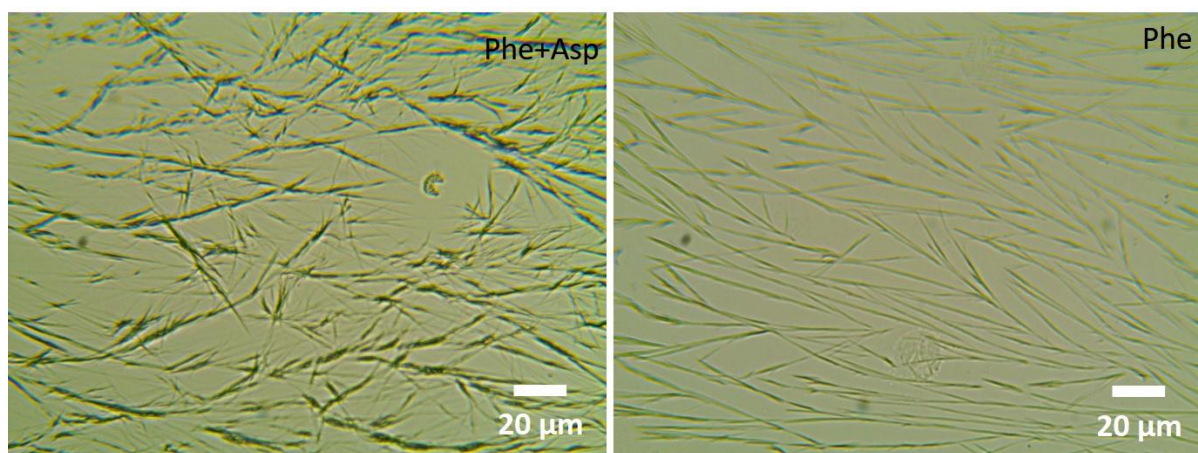

**Figure S33: - Optical images for self-assembly of co-assembled phenylalanine:aspartic acid (1mg/mL and 0.5 mg/mL, respectively) and only phenylalanine in aqueous medium**

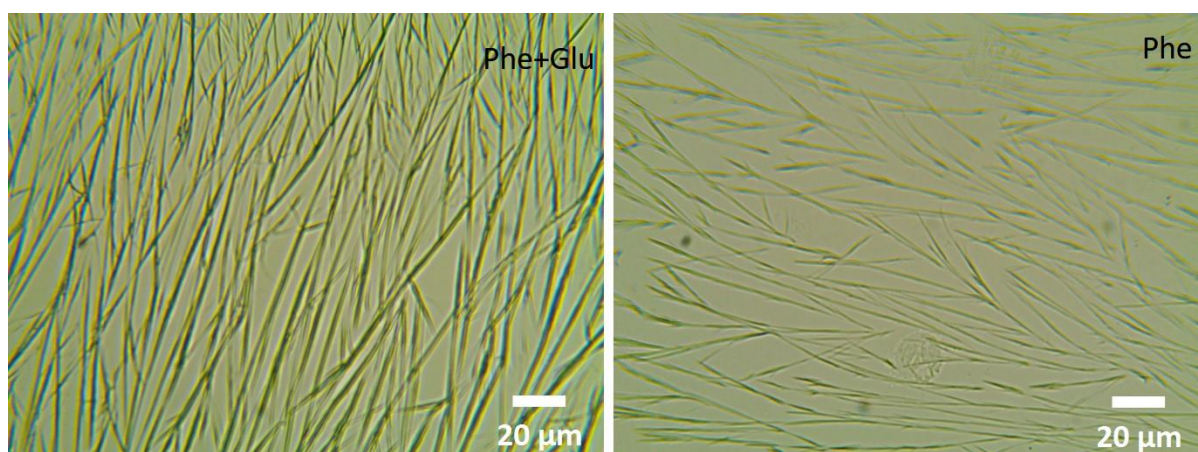

**Figure S34: - Optical images for self-assembly of co-assembled phenylalanine:Glutamic acid (1mg/mL and 0.5 mg/mL, respectively) and only phenylalanine in aqueous medium**

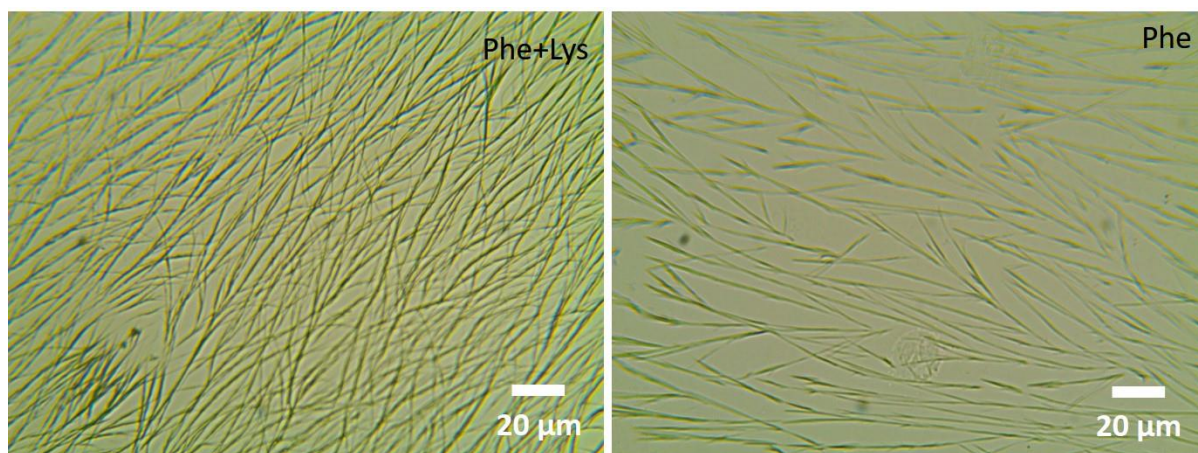

**Figure S35: - Optical images for self-assembly of co-assembled phenylalanine:lysine (1mg/mL and 0.5 mg/mL, respectively) and only phenylalanine in aqueous medium**

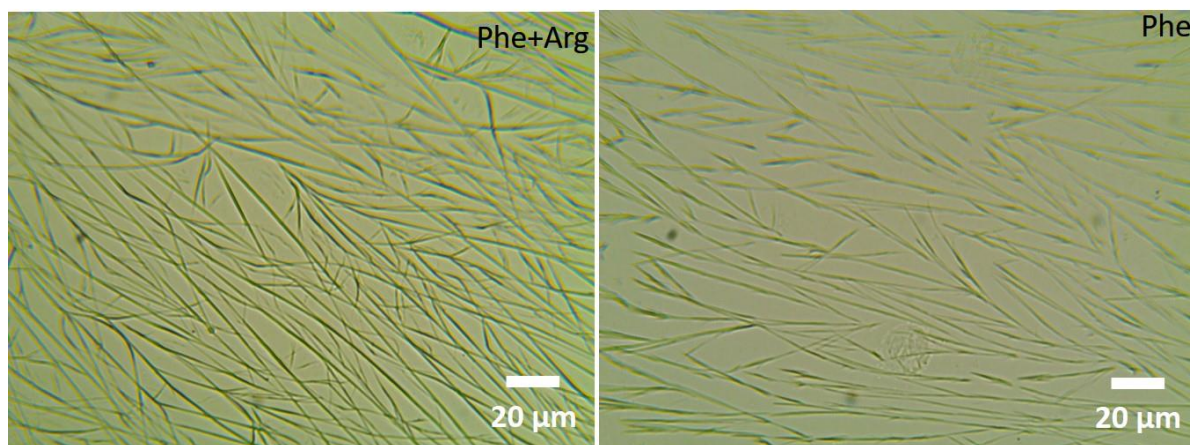

**Figure S36:** - Optical images for self-assembly of co-assembled phenylalanine:arginine (1mg/mL and 0.5 mg/mL, respectively) and only phenylalanine in aqueous medium

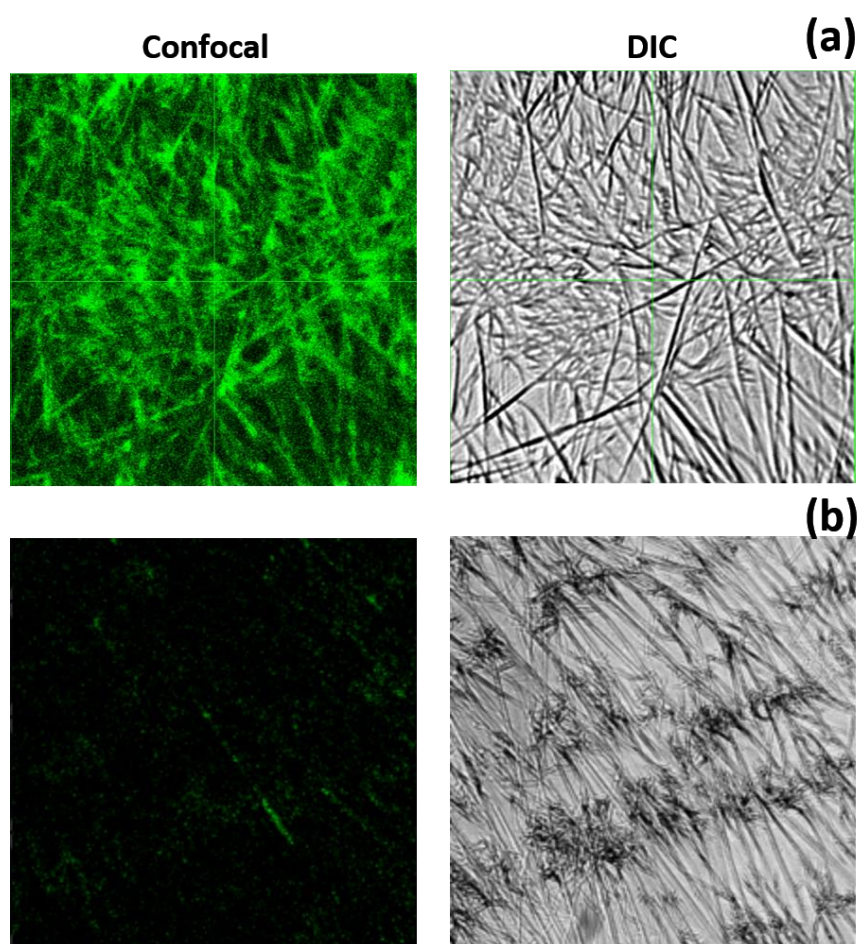

**Figure S37:** - Deposited phase ThT binding assay for phenylalanine fibrils (a) and Phenylalanine and Leucine (1:0.5 mg/mL) co-assembly state (b).
